# Supplementary material
Source: publisher figshare collection journal article supplement (https://tandf.figshare.com/ndownloader/files/12980858)
Supplement: Supplementary file 1 [file 12980858]

## **ORIGINAL RESEARCH ARTICLE**

### **Chemical residues in beebread, honey, pollen and wax samples collected from bee hives placed on canola crops in Western Australia**

Rob Manning<sup>a,b\*</sup>

<sup>a</sup>*Formerly, Plant Biosecurity, Western Australian Department of Agriculture and Food.*

<sup>b</sup>*301 Forrest Rd, Bibra Lake, Western Australia 6163*

(Received 26 January 2017, accepted 26 May 2018)

\*Corresponding author: Email: [skuptur@bigpond.com](mailto:skuptur@bigpond.com)

### **Online Supplementary Material**

Table S1. Canola location, variety, management and chemical use of the 15 farms used for the 2014 survey. Herbicide systems: TT - triazine tolerant; RR - Roundup Ready (Genetically modified (GM)); CL - Clearfield.

| Farm | Farm code | Location                    | Canola variety                                | GM | Date planted | Kg seed/ha | Crop size (ha) | Exp. beehives in | Exp. beehives out | Prior crop                | Chemicals/ha                                                                                                                                                                                                                                                                                                                                                                                            | Comments                                                                                                                              |
|------|-----------|-----------------------------|-----------------------------------------------|----|--------------|------------|----------------|------------------|-------------------|---------------------------|---------------------------------------------------------------------------------------------------------------------------------------------------------------------------------------------------------------------------------------------------------------------------------------------------------------------------------------------------------------------------------------------------------|---------------------------------------------------------------------------------------------------------------------------------------|
| 1    | EC50      | Three Springs (Strutton Rd) | Nuseed GT-50 RR                               | Y  | 28-Apr       | 2-4        | 350            | 25-Jul           | 25-Aug            | wheat 2013<br>canola 2012 | alpha-cypermethrin 150ml, chlorpyrifos 200ml, glyphosate (2 applications), <b>Seed treatment:</b> Jockey (fluquinconazole/Gaucho (imidacloprid)                                                                                                                                                                                                                                                         | No beekeepers on the property for 4-5 years                                                                                           |
| 2    | EC        | Three Springs (Dookanooka ) | Pioneer 43Y23 RR CL                           | Y  | 02-May       | 2-4        | >350           | 25-Jul           | 25-Aug            | wheat 2013<br>wheat 2012  | alpha-cypermethrin 150ml, chlorpyrifos 200ml, glyphosate (2 applications), <b>Seed treatment:</b> Cruiser OPTI MAX (thiamethoxam/lambda-cyhalothrin)                                                                                                                                                                                                                                                    | No beekeepers on the property for 4-5 years                                                                                           |
| 3    | BFB       | Three Springs (watertank)   | Nuseed ATR Cobbler TT                         | N  | 30-Apr       | 4          | 88             | 25-Jul           | 25-Aug            | unknown                   | Atrazine (Gesaprim) 1.1kg - 2 applications, propyzamide (herbicide) 1kg, paraquat 1L, chlorpyrifos (Lorsban) 500ml, atrazine 1.1kg - 2 applications, iprodione (Sextant) 200ml, alpha-cypermethrin (Ken-Tac) 200ml, clethodim (Havoc) 500ml, Hasten 1% (adjuvant - fatty acid esters), Amso 1% (adjuvant - ammonium sulphate), <b>Seed treatment:</b> nil.                                              | Beekeeper (BF) beehives in on the 18 July with one load (100 hives). There are 600 more hives elsewhere on the extensive farm holding |
| 4    | AT        | Three Springs (15km West)   | Pioneer 44Y24 RR CL                           | Y  | 04-May       | 2.7        | 60             | 25-Jul           | 25-Aug            | unknown                   | Trifluralin (Treflan) 1.8L, paraquat 1L, chlorpyrifos 500ml, glyphosate (Roundup Ready) 900g - 2 applications, alpha-cypermethrin (Alpha-Duo) 200ml, <b>Seed treatment:</b> Cruiser OPTI MAX (thiamethoxam/lambda-cyhalothrin.                                                                                                                                                                          |                                                                                                                                       |
| 5    | ATT       | Three Springs (2km South)   | Nuseed ATR Cobbler TT<br>Nuseed ATR Bonito TT | N  | 03-May       | 2.6        | 187            | 25-Jul           | 25-Aug            | unknown                   | Atrazine (Gesaprim) 1.1kg - 2 applications, trifluralin (Treflan) 1.8L, paraquat 1L, chlorpyrifos (Lorsban) 500ml, atrazine 1.1kg - 2 applications, iprodione (Sextant) 200ml, alpha-cypermethrin (Ken-Tac) 200ml, clethodim (Havoc) 500ml, Hasten 1% (adjuvant - fatty acid esters), Amso 1% (adjuvant - ammonium sulphate), <b>Seed treatment:</b> Cruiser OPTI MAX (thiamethoxam/lambda-cyhalothrin. | Beekeeper (BF) beehives in on 23 July with one load (100 hives). There are 600 hives on rest of the extensive farm holding.           |

| Farm | Farm code | Location           | Canola variety           | GM | Date planted      | Kg seed/ha | Crop size (ha) | Exp. beehives in | Exp. beehives out | Prior crop                | Chemicals/ha                                                                                                                                                            | Comments                                                                                                                                                                                                          |
|------|-----------|--------------------|--------------------------|----|-------------------|------------|----------------|------------------|-------------------|---------------------------|-------------------------------------------------------------------------------------------------------------------------------------------------------------------------|-------------------------------------------------------------------------------------------------------------------------------------------------------------------------------------------------------------------|
| 6    | ABK       | Kulin (Hinkley Rd) | Nuseed ATR Cobbler TT    | N  | first week in May | 9 ?        | 260            | 27-Jul           | 03-Sep            | Wheat 2013                | Atrazine 2kg, atrazine 1.5kg, omethoate (miticide) 500ml, quizalofop (Targa herbicide) 100ml, sethoxydim (Sertin) 500ml, <b>Seed treatment:</b> nil.                    | Beekeeper (AB) has been on the same farm site for 2 years ~ 100 hives.                                                                                                                                            |
| 7    | ABB       | Kulin (Tolga)      | NPZA Sturt TT            | N  | Unk               | 1.4        | 2-3            | 27-Jul           | 03-Sep            | Barley wheat pasture 2013 | Atrazine, quizalofop-p-ethyl (Targa herbicide), <b>Seed treatment:</b> imidacloprid & fipronil.                                                                         |                                                                                                                                                                                                                   |
| 8    | BS        | Kulin (Tarin Rock) | NPZA Sturt TT            | N  | Unk               | 1.4        | 100            | 27-Jul           | 03-Sep            | Barley wheat pasture 2013 | Atrazine - 2 applications 2.2kg, quizalofop (Targa herbicide) 250ml, clethodim (Select) 450ml, <b>Seed treatment:</b> Jockey (fluquinconazole/Gaucha (imidacloprid)     |                                                                                                                                                                                                                   |
| 9    | KF        | Moora              | Pacific seeds Crusher TT | N  | 25-Apr            | 6          | 650            | 29-Jul           | 11-Sep            | Hay oats 2013             | Atrazine 1.1kg - 2 applications, chlorpyrifos (Lorsban) 500ml, bifenthrin 200ml, trifluran (treflan) 3L, clethodim 500ml, quizalofop 200ml, <b>Seed treatment:</b> nil. | Beekeeper (KF) beehives in on 24 Jul with 100 hives, 29 July with 100 hives; Beekeeper (BM) beehives in on 3 July with 300 hives. BM has used the property for 3-4 years & extracted 3 boxes of honey to 10 Sept. |
| 10   | BM        |                    |                          |    |                   |            |                |                  |                   |                           |                                                                                                                                                                         |                                                                                                                                                                                                                   |

| Farm | Farm code | Location    | Canola variety                                 | GM | Date planted | Kg seed/ha | Crop size (ha) | Exp. beehives in | Exp. beehives out | Prior crop   | Chemicals/ha                                                                                                                                                                                                                                                                                                                | Comments                         |
|------|-----------|-------------|------------------------------------------------|----|--------------|------------|----------------|------------------|-------------------|--------------|-----------------------------------------------------------------------------------------------------------------------------------------------------------------------------------------------------------------------------------------------------------------------------------------------------------------------------|----------------------------------|
| 11   | JM        | Moora       | Duvuro ATR Stubby TT                           | N  | 15-May       | 5          | 208            | 29-Jul           | 11-Sep            | Pasture 2013 | Atrazine 1.1kg - 2 applications, bifenthrin (red legged mite), Select herbicide, <b>Seed treatment:</b> nil                                                                                                                                                                                                                 |                                  |
| 12   | WTR       | Cataby      | Pacific seeds Crusher TT                       | N  | Unk          | Unk        | Unk            | 12-Aug           | 11-Sep            | unknown      | Farm had no copies of on-farm chemical use - they used an off-farm agronomist/consultant, <b>Seed treatment:</b> nil.                                                                                                                                                                                                       | Beekeeper: beehives in on 6 Aug. |
| 13   | NMR       | Bindi Bindi | Nuseed GT-41 RR                                | Y  | 26-Apr       | 2.6        | 363            | 19-Aug           | 14-Sep            | Barley 2013  | Trifluralin 2.5L, chlorpyrifos 350ml, bifenthrin 200ml, glyphosate (Roundup Ready Plantshield) 900g - 2 applications, alpha-cypermethrin 150ml - 2 applications, prothioconazole+tebuconazole (Prosaro - fungicide) 450 ml, <b>Seed treatment:</b> Cruiser OPTI MAX (10L/tonne & 4L/tonne) thiamethoxam/lambda-cyhalothrin. | Flowering commenced 10 Jul.      |
| 14   | NM        | Bindi Bindi | Nuseed ATR Stingray TT                         | N  | 11-Apr       | 3.1        | 220            | 19-Aug           | 14-Sep            | Barley 2013  | Atrazine 1.1kg - 2 applications, bifenthrin 200ml, chlorpyrifos 350ml, trifluralin 2.5L, quizalofop 200ml, triclopyr 100ml, clethodim 500ml, quizalofop 60ml, alpha-cypermethrin                                                                                                                                            | Flowering commenced 1 Jul.       |
| 15   | NMM       | Bindi Bindi | Nuseed ATR Stingray TT<br>Nuseed ATR Bonito TT | N  | 11-Apr       | 3.1        | 34             | 19-Aug           | 14-Sep            | Barley 2013  | Atrazine 1.1kg - 2 applications, bifenthrin 200ml, chlorpyrifos 350ml, trifluralin 2.5L, quizalofop 200ml, triclopyr 100ml, clethodim 500ml, quizalofop 60ml, alpha-cypermethrin 150ml, <b>Seed treatment:</b> Cruiser OPTI MAX (thiamethoxam/lambda-cyhalothrin, flutriafol - banded 250ml                                 | Flowering commenced 1 Jul.       |

## Supplementary materials and methods

To determine the feasibility of analysis, only bee bread – the highest contaminated source within the hive, with the most samples was investigated from DAFWA experimental hives (as they were present on all farms) was analyzed along with samples from beehives located on native flora (B1-B4 sites). Data from six beekeepers who had hives on canola farms was excluded. The number of chemicals detected in a sample was calculated as the total number of chemicals that had a trace (T) detected or a value greater than zero.

The counts of the number of chemicals detected were consistent with what might be expected, namely the fewest chemicals for native flora and GM treated seed samples, more for Non-GM treated seed samples and the most for Non-GM, non-treated seed samples. When there were chemicals detected, GM samples tended to have more chemicals detected. Because so many of the counts are very small, a standard  $\chi^2$  test would be unreliable. Therefore, a presence/absence variable was investigated, where presence indicated that one or more chemicals were detected in the sample and absence for no chemicals detected in the sample.

A Pearson's  $\chi^2$  test was conducted on the Not Detected/Detected data (not shown) to determine whether there were differences between the treatment type in terms of likelihood of chemicals being detected in beebread. Although the trend in the *ratio* of the number of hives with/without chemicals appears meaningful, there was insufficient power to detect any statistically significant difference (p-value 0.533,  $\chi^2 = 2.195$ , df = 3).

When beekeeper's hives were included in a  $\chi^2$  test on treatment types, a statistically significant difference was found (p-value = 0.024), however small expected counts make the test unreliable. The same test using presence/absence rather than counts of chemicals had no significant difference (p-value = 0.114). A  $\chi^2$  test (excluding beekeeper hives) on treatment types for the counts of samples that had 'No chemicals' detected, '1-2 chemicals' detected and '3-4 chemicals' detected was also not significant (p-value = 0.642).
